# Supplementary material
Source: PubMed Central journal article supplement (PMC7159278)
Supplement: mmc1.pdf [file mmc1.pdf]

# THE LANCET

## **Supplementary appendix**

This appendix formed part of the original submission and has been peer reviewed. We post it as supplied by the authors.

Supplement to: Zumla A, Hui DS, Perlman S. Middle East respiratory syndrome. *Lancet* 2015; published online June 3. [http://dx.doi.org/10.1016/S0140-6736\(15\)60454-8](http://dx.doi.org/10.1016/S0140-6736(15)60454-8).

## Supplementary Figure 1-Sources of information on MERS and MERS-CoV

| Organization/Institution                                       | Website                                                                                                                                                                             | Information, guidelines and documents available                                                                                                                                                                                                                                                                                                                                                                                                                                                                                                                                                                                                                                   |
|----------------------------------------------------------------|-------------------------------------------------------------------------------------------------------------------------------------------------------------------------------------|-----------------------------------------------------------------------------------------------------------------------------------------------------------------------------------------------------------------------------------------------------------------------------------------------------------------------------------------------------------------------------------------------------------------------------------------------------------------------------------------------------------------------------------------------------------------------------------------------------------------------------------------------------------------------------------|
| 1. World Health Organization (WHO)                             | <a href="http://www.who.int/csr/disease/coronavirus_infections/en/">http://www.who.int/csr/disease/coronavirus_infections/en/</a>                                                   | <ol style="list-style-type: none"> <li>1. Updates on global MERS cases and IHR emergency committee deliberations on MERS.</li> <li>2. Technical guidance-laboratory testing for MERS</li> <li>3. Technical guidance -surveillance and sero-epidemiological investigation</li> <li>4. Technical guidance-infection prevention and control</li> <li>5. Technical guidance-clinical management</li> <li>6. Study protocols- seroprevalence and case control studies</li> <li>7. Disease outbreak news on coronavirus infection</li> <li>8. Global Alert and response: coronavirus infections</li> <li>9. WHO risk assessment: MERS</li> <li>10. WHO travel advice on MERS</li> </ol> |
| 2. Centers for Disease Control and Prevention (US-CDC)         | <a href="http://www.cdc.gov/coronavirus/mers/">http://www.cdc.gov/coronavirus/mers/</a>                                                                                             | <ol style="list-style-type: none"> <li>1. Updates on MERS</li> <li>2. MERS -patient under investigation</li> <li>3. Interim guidance on implementing home care isolation or quarantine of people not requiring hospitalization for MERS-CoV</li> <li>4. Interim guidance for preventing MERS-CoV from spreading to others in homes and communities</li> <li>5. CDC expert commentary</li> <li>6. Information for specific groups <ul style="list-style-type: none"> <li>-people at risk of MERS</li> <li>-healthcare providers</li> <li>-health departments</li> <li>-laboratories</li> <li>-travellers and airline crews</li> </ul> </li> <li>7. About MERS infection</li> </ol> |
| 3. European Centre for disease prevention and control (ECDC)   | <a href="http://www.ecdc.europa.eu/en/health-topics/coronavirus-infections/Pages/index.aspx">http://www.ecdc.europa.eu/en/health-topics/coronavirus-infections/Pages/index.aspx</a> | <ol style="list-style-type: none"> <li>1. News and epidemiological updates on MERS</li> <li>2. MERS-CoV factsheet</li> <li>3. Rapid risk assessment- MERS updates</li> <li>4. FAQs on MERS-CoV</li> <li>5. Advice to pilgrims to Saudi Arabia</li> </ol>                                                                                                                                                                                                                                                                                                                                                                                                                          |
| 4. Public Health England (PHE)                                 | <a href="https://www.gov.uk/search?q=mers-cov">https://www.gov.uk/search?q=mers-cov</a>                                                                                             | <ol style="list-style-type: none"> <li>1. MERS updates</li> <li>2. MERS-CoV risk assessment, management guidance</li> <li>3. MERS-CoV- information for travellers to the Middle East</li> <li>4. MERS-CoV: epidemiological protocols to assess cases and their close contacts in the UK</li> <li>5. Treatment of MERS-CoV -information for clinicians</li> <li>5. Laboratory testing guidelines</li> </ol>                                                                                                                                                                                                                                                                        |
| 5. Center for Infectious Diseases Research and Policy (CIDRAP) | <a href="http://www.cidrap.umn.edu/infectious-disease-topics/mers-cov">http://www.cidrap.umn.edu/infectious-disease-topics/mers-cov</a>                                             | Frequent updates and latest news on MERS                                                                                                                                                                                                                                                                                                                                                                                                                                                                                                                                                                                                                                          |
| 6. Program for Monitoring Emerging Diseases (ProMED)           | <a href="http://www.promedmail.org/aboutus/">http://www.promedmail.org/aboutus/</a>                                                                                                 | Daily updates on MERS-CoV cases identified globally through an Internet-based reporting system dedicated to rapid global dissemination of information                                                                                                                                                                                                                                                                                                                                                                                                                                                                                                                             |
| 7. Saudi Ministry of Health Portal                             | <a href="http://www.moh.gov.sa/en/Search/Pages/Default.aspx?k=mers">http://www.moh.gov.sa/en/Search/Pages/Default.aspx?k=mers</a>                                                   | <ol style="list-style-type: none"> <li>1. Updates and statistics on MERS</li> <li>2. Case definition</li> <li>3. Guidelines</li> </ol>                                                                                                                                                                                                                                                                                                                                                                                                                                                                                                                                            |
|                                                                |                                                                                                                                                                                     |                                                                                                                                                                                                                                                                                                                                                                                                                                                                                                                                                                                                                                                                                   |

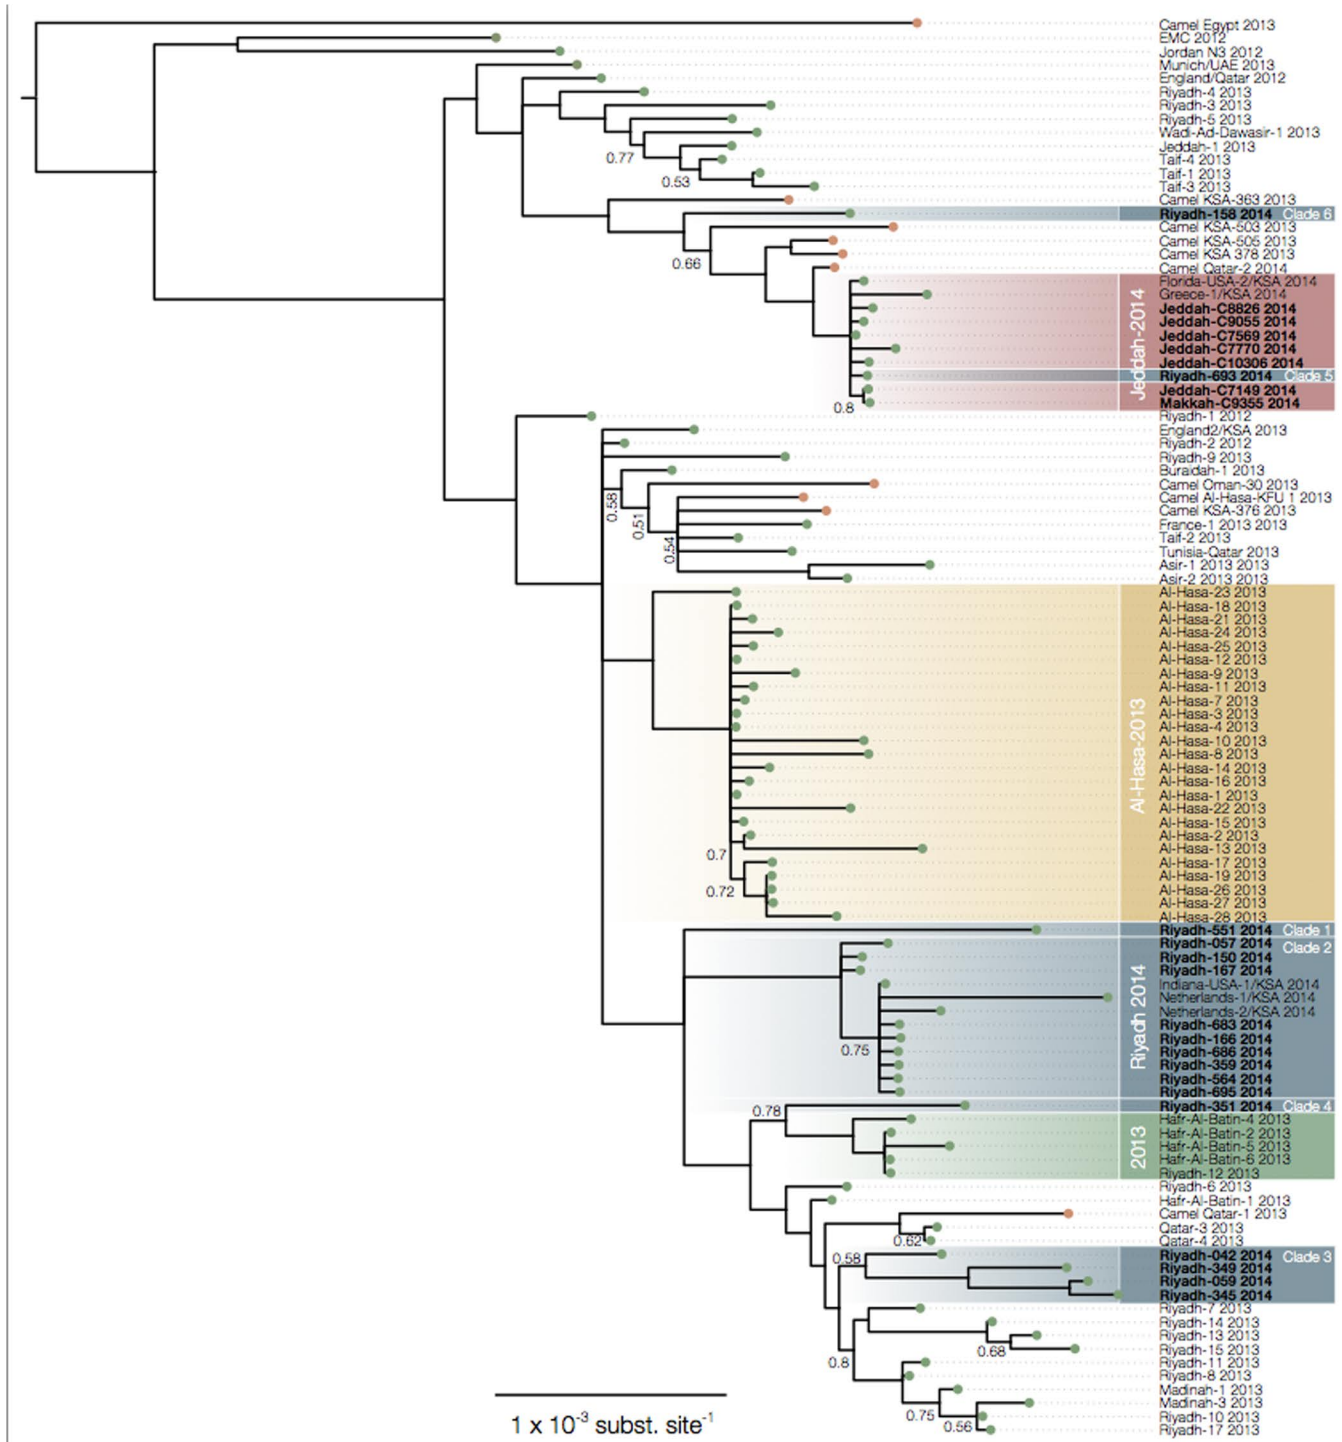

Supplementary Figure 2
